# Supplementary material
Source: Springer Nature journal article supplement (https://www.springermedizin.de/resource/supplementary/12885_2008_1759_MOESM3_ESM.pdf/9472866)

PDGFA

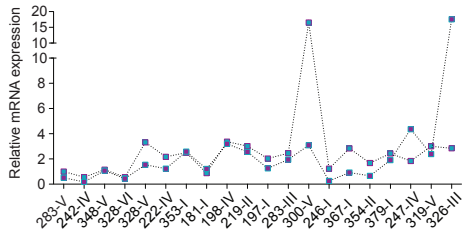

PDGFB

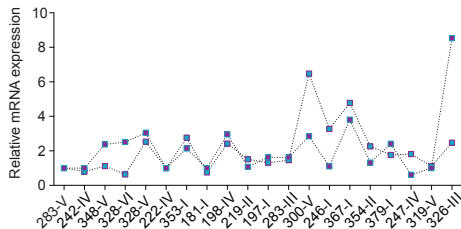

PDGFRA

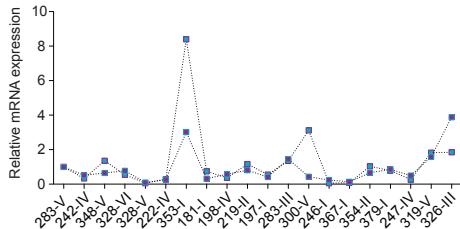

TaqMan  
 Microarray

Supplement: MOESM3 [file 9472866]
